# Supplementary material
Source: publisher figshare collection journal article supplement (https://gsajournals.figshare.com/articles/dataset/_/14702139)

## **Appendix S5: Terminal phenotypes of maternal-effect lethal embryos**

This appendix contains representative images of the terminal phenotypes observed in 27 maternal-effect lethal strains. Eggs were dissected from young homozygous mutant adults and incubated overnight in distilled water (unless otherwise indicated). Corresponding gene and strain names are indicated in each panel with a short description of the terminal phenotypes observed. Multiple images per allele are included where appropriate, if more than one phenotype was common in a particular strain. All scale bars represent 10  $\mu\text{m}$ .



**Figure S5.1**

*F21D5.1*

GE2402(*t1940*)

(Embryos shown were incubated in M9 buffer.)  
Embryos appear undivided with a severe osmotic integrity defect. Many eggs burst after incubation in water.

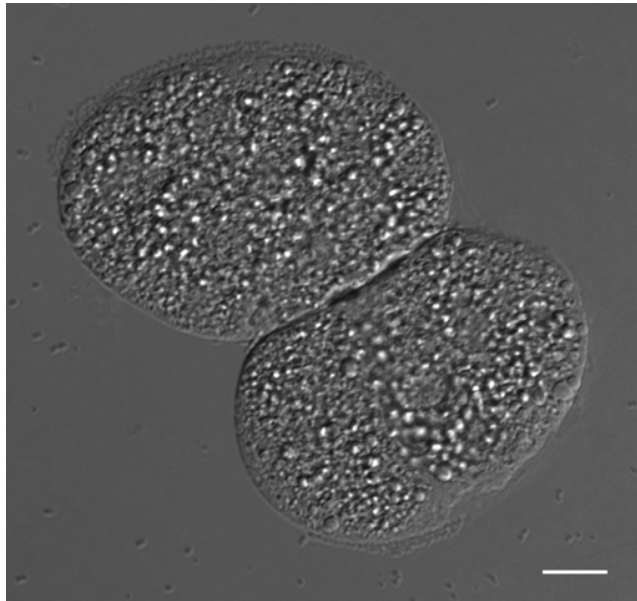

**Figure S5.2**

*F21D5.1*

GE2445(*t1935*)

Embryos appear undivided and shrunken within the eggshell; many eggs burst after incubation in water.

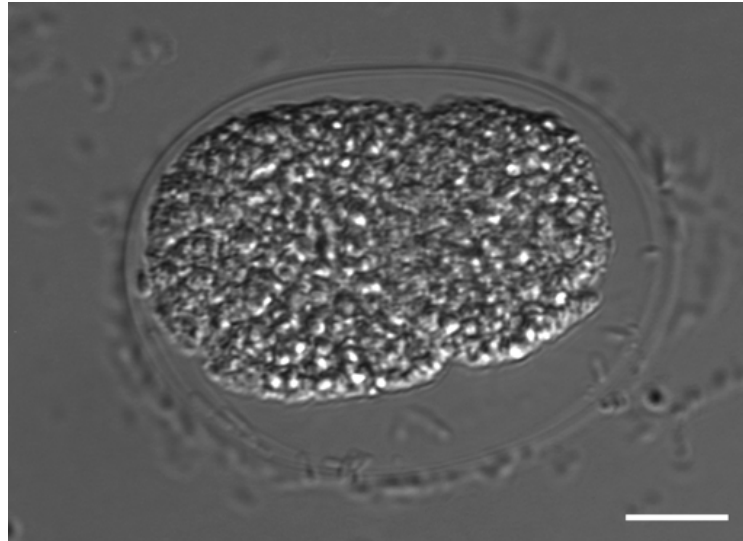



**Figure S5.3**

*trcs-1*

GE1939(*t1745*)

(Embryo shown was incubated in M9 buffer.)  
Undivided embryos have a severe osmotic integrity defect. Many eggs burst after incubation in water.

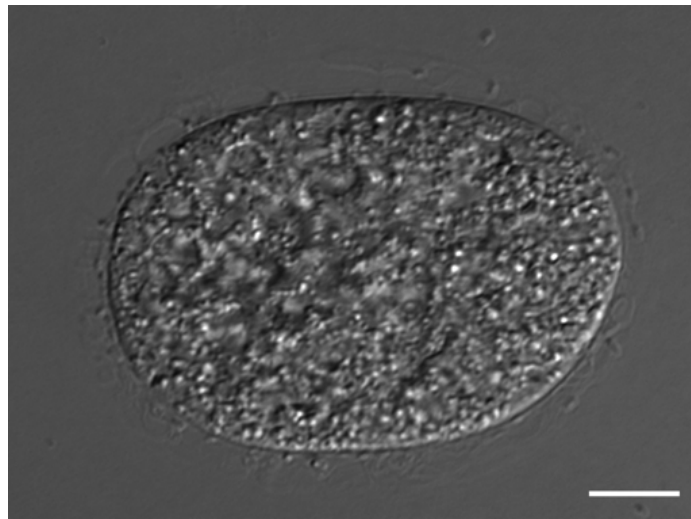

**Figure S5.4**

*trcs-1*

GE2512(*t1909*)

Embryos fill the eggshell completely; some have invaginations along the cell membrane. Many eggs burst after incubation in water.

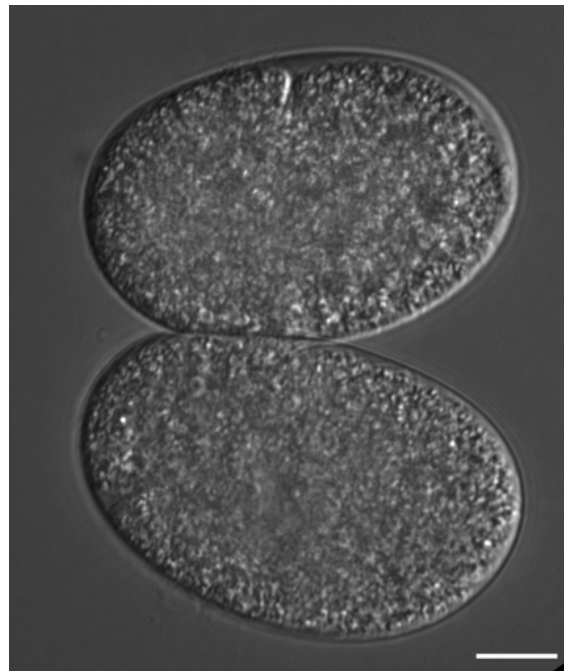



**Figure S5.5**

*perm-5*

GE2453(*t1900*)

(Image taken  
immediately after  
dissection.)

Embryos fill the eggshell  
completely. Many eggs  
burst after incubation in  
water, as did eggs from  
GE2391(*t1932*) (not  
shown).

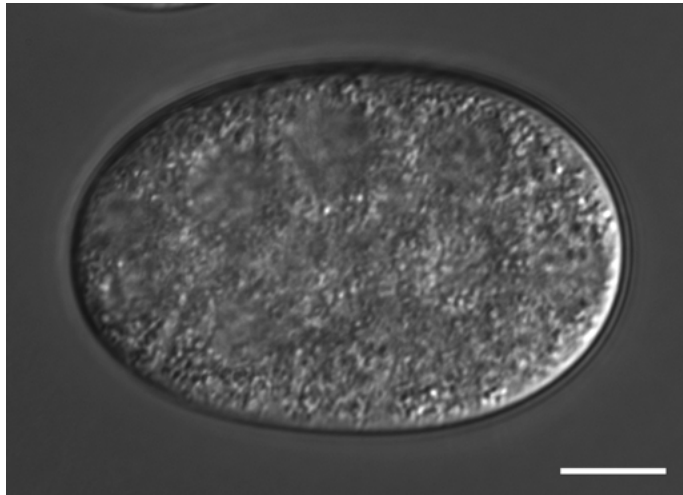

**Figure S5.6 A**

*bckd-1A*

GE2206(*t1514*)

Embryos appear  
undivided; some eggs  
are more round than  
oval.

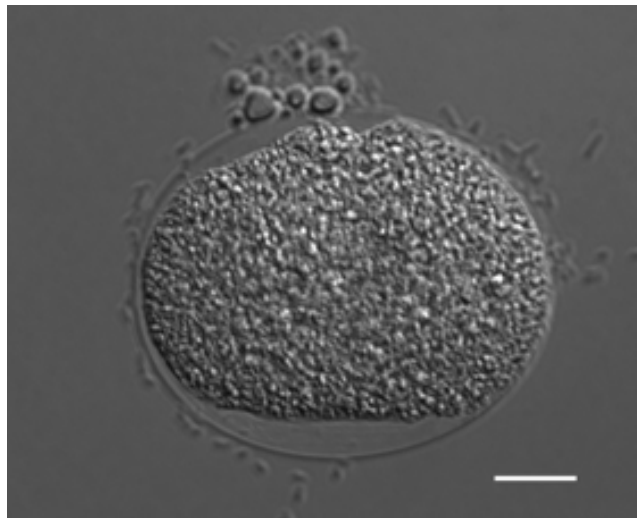



**Figure S5.6 B**

*bckd-1A*

GE2206(*t1514*)

(Embryos imaged immediately, without overnight incubation.)  
Undivided embryos fill the eggshell completely.

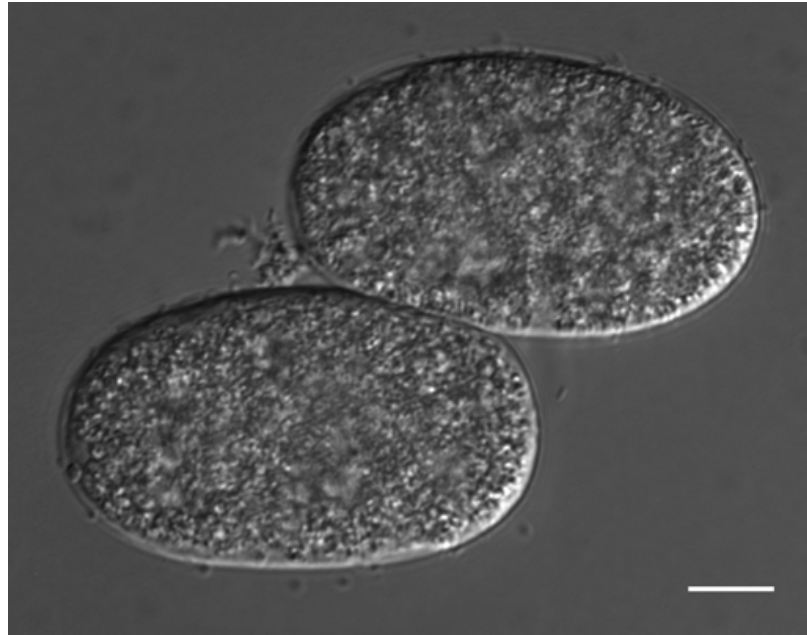

**Figure S5.7 A**

*bckd-1A*

GE2627(*t1603*)

(Embryo incubated in M9 buffer.)  
Some embryos appear undivided with invaginations along the cell membrane.

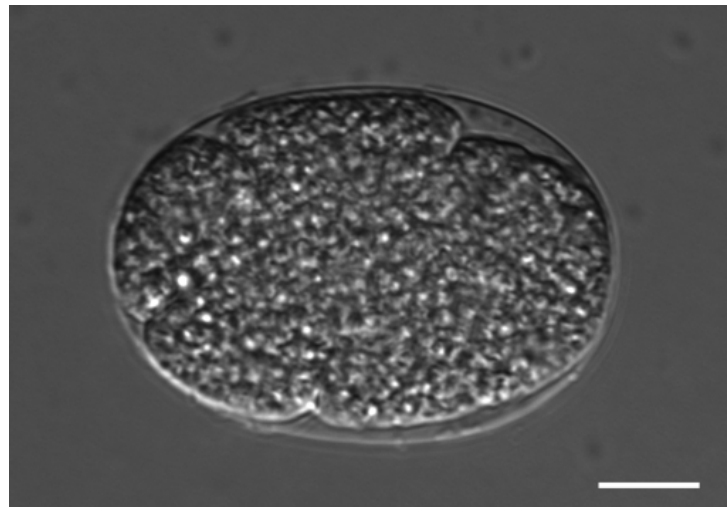



**Figure S5.7 B**

*bckd-1A*

GE2627(*t1603*)

(Embryos incubated in  
M9 buffer.)

Some embryos fill the  
eggshell and exhibit  
Brownian motion in large  
vacuoles.

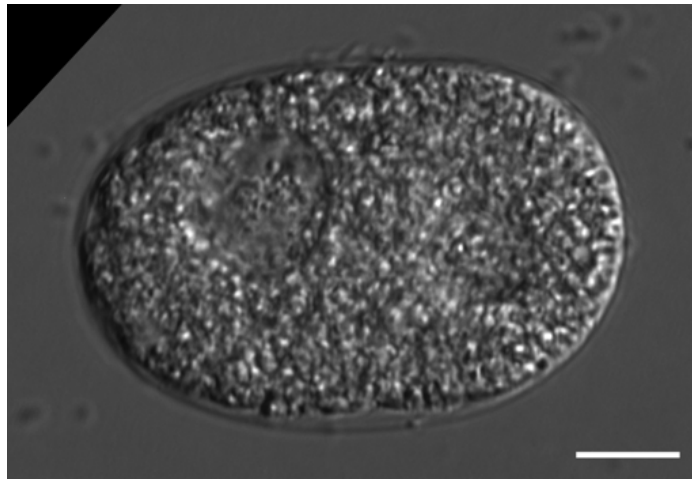

**Figure S5.8 A**

*dlat-1*

GE2541(*t2035*)

Some embryos arrest at  
the one-cell stage.

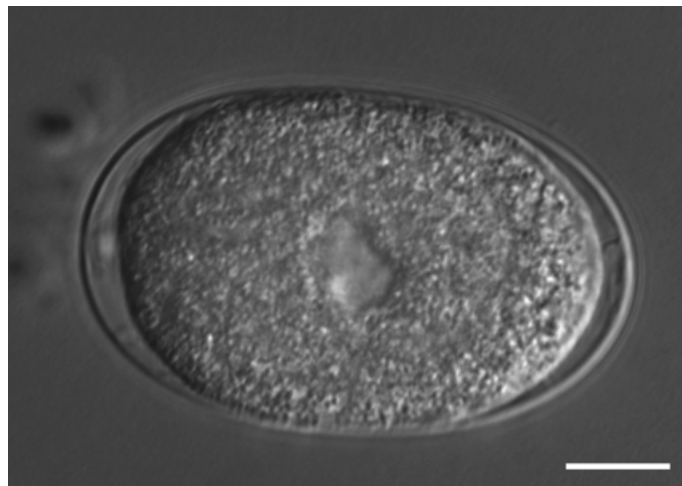



**Figure S5.8 B**

*dlat-1*

GE2541(*t2035*)

Some embryos arrest  
with four cells or less.

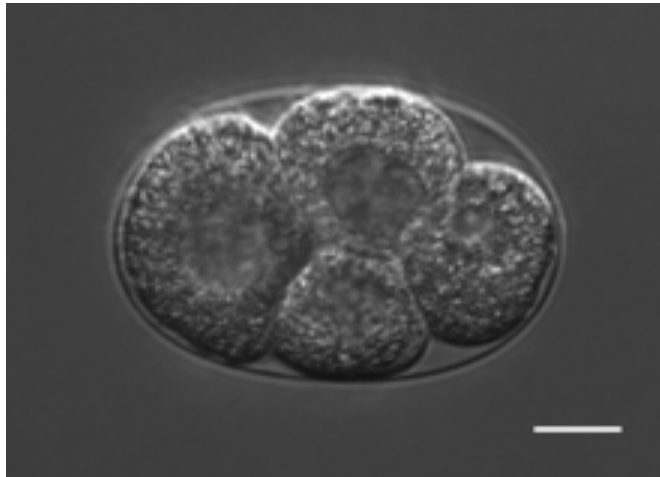

**Figure S5.8 C**

*dlat-1*

GE2541(*t2035*)

Some embryos arrest  
with approximately 20  
cells and others arrest  
during the first cell  
division.

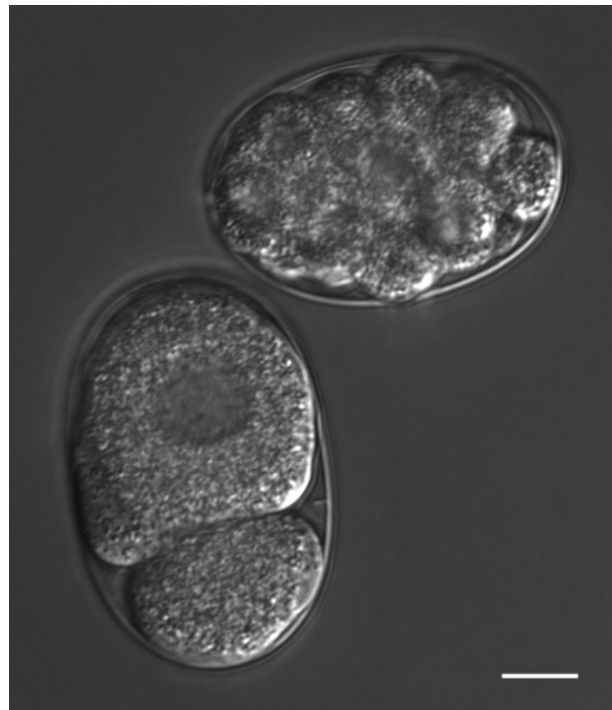



**Figure S5.9 A**

*dlat-1*

GE2335(*t2056*)

Some embryos arrest at  
the one-cell stage.

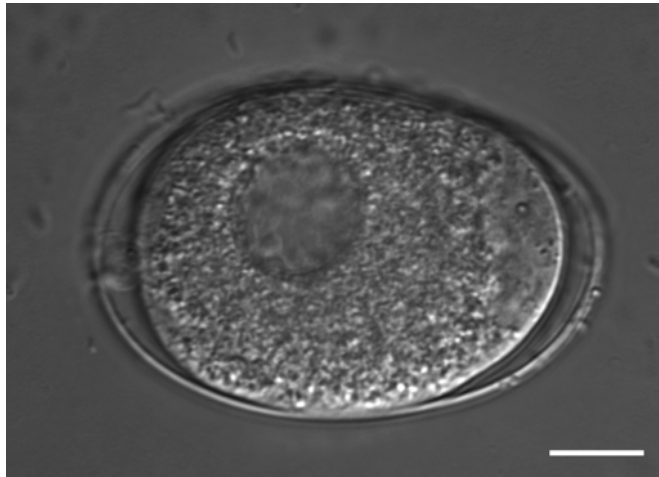

**Figure S5.9 B**

*dlat-1*

GE2335(*t2056*)

Some embryos arrest  
during the first cell  
division.

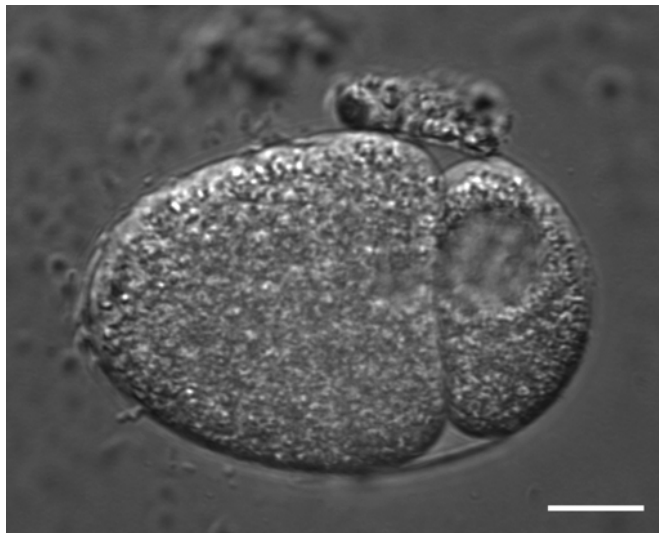



**Figure S5.9 C**

*dlat-1*

GE2335(*t2056*)

Some embryos arrest  
with approximately 20  
cells.

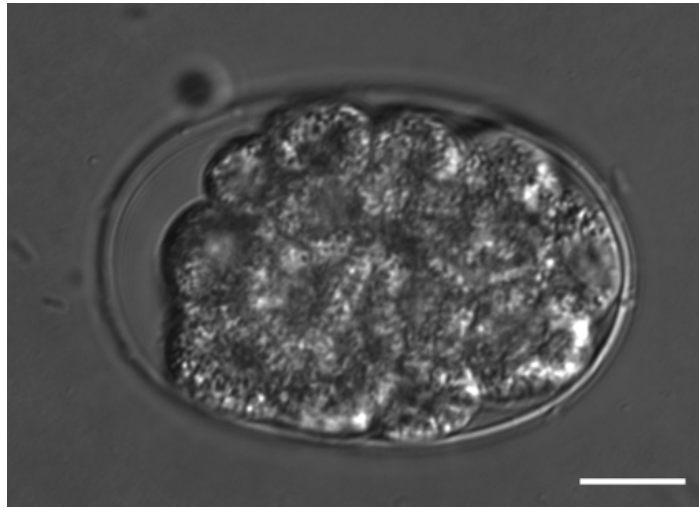

**Figure S5.10**

*dgtr-1*

GE2135(*t2043*)

(Image taken  
immediately after  
dissection.)  
Embryos fill the eggshell  
completely. Many eggs  
burst after incubation in  
water.

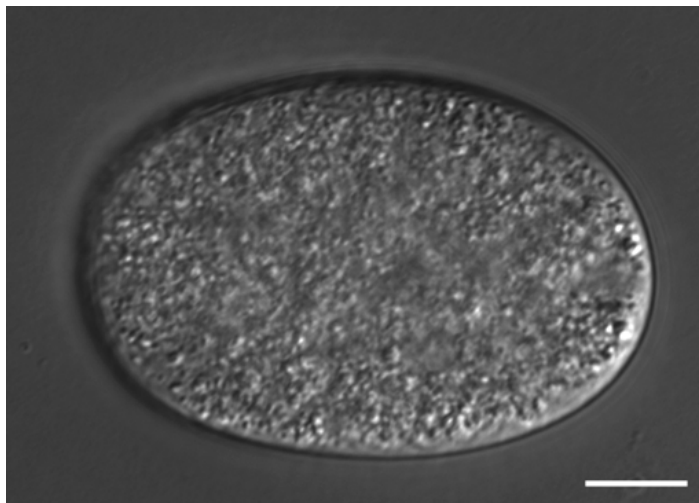



**Figure S5.11 A**

*dgtr-1*

GE2063(*t2042*)

Some embryos fill the eggshell completely and appear roundish; others burst after incubation in water.

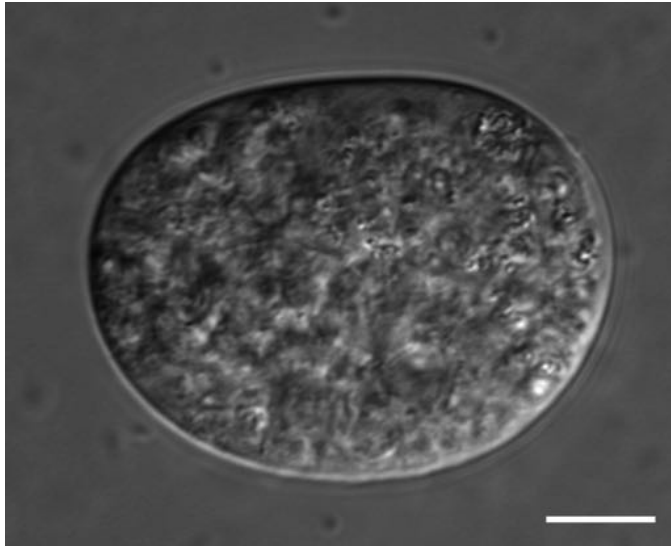

**Figure S5.11 B**

*dgtr-1*

GE2063(*t2042*)

Most embryos arrest with approximately 100 cells and have misshapen eggs.

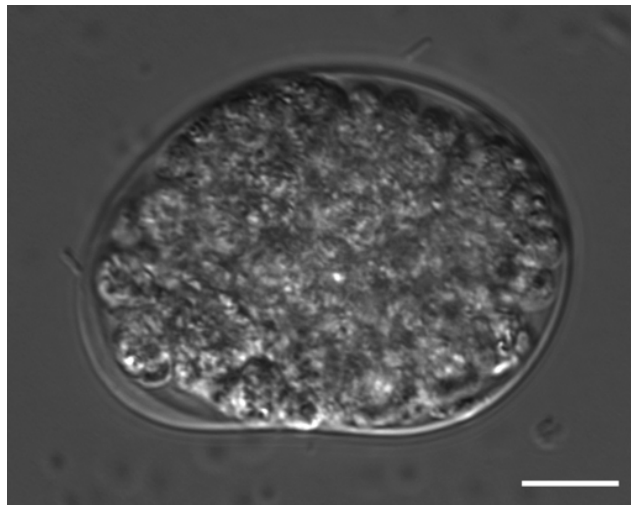



**Figure S5.12**

*cls-2*

GE2357(*t1527*)

Embryos appear undivided and shrunk within the eggshell.

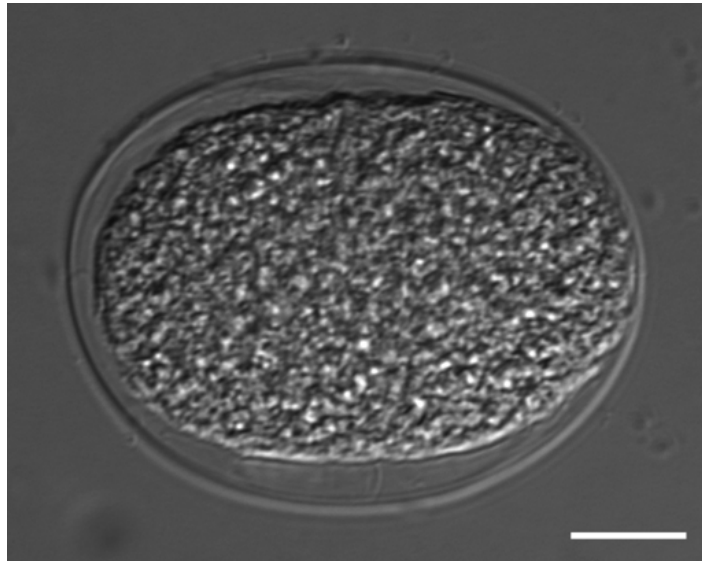

**Figure S5.13**

*cls-2*

GE2275(*t1517*)

(Embryo incubated in M9 buffer.)

Embryos arrest with approximately 100 cells. Some exhibit a contraction movement.

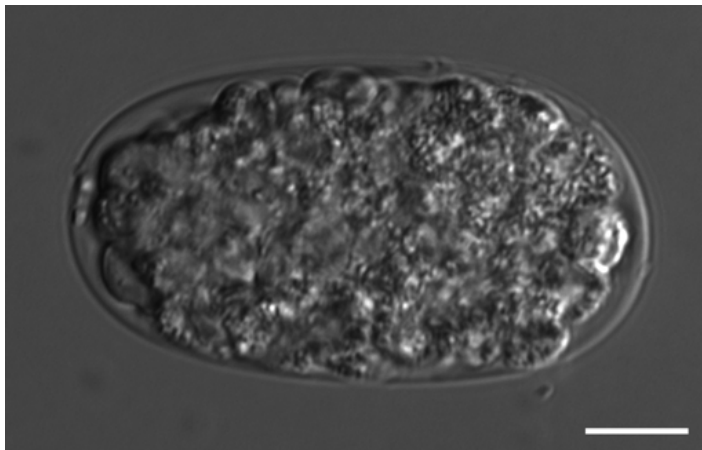



**Figure S5.14**

*cept-2*

GE2122(*t2007*)

Embryos appear disorganized with approximately 100 cells. Some have large vacuoles with Brownian motion. Few exhibit a contraction movement.

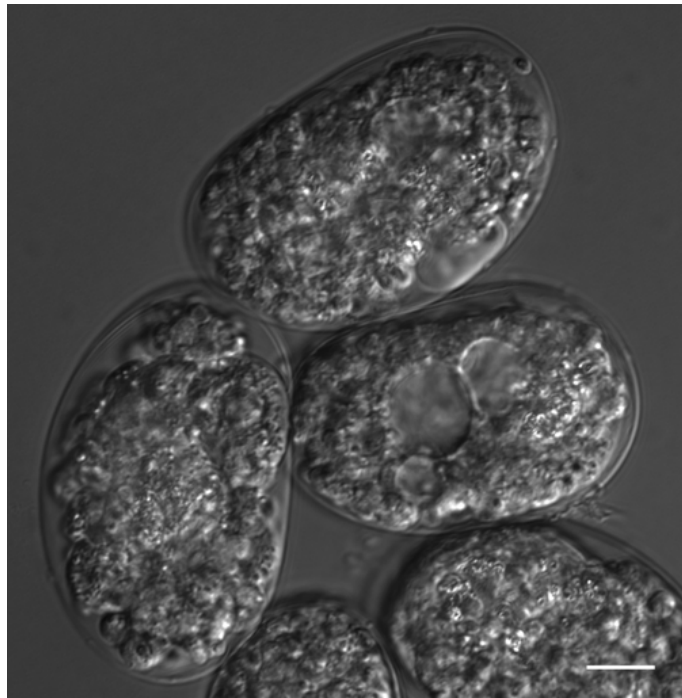

**Figure S5.15**

*cept-2*

GE2047(*t2021*)

Most embryos appear disorganized with approximately 100 cells and large vacuoles with Brownian motion. Some embryos fill the eggshell completely.

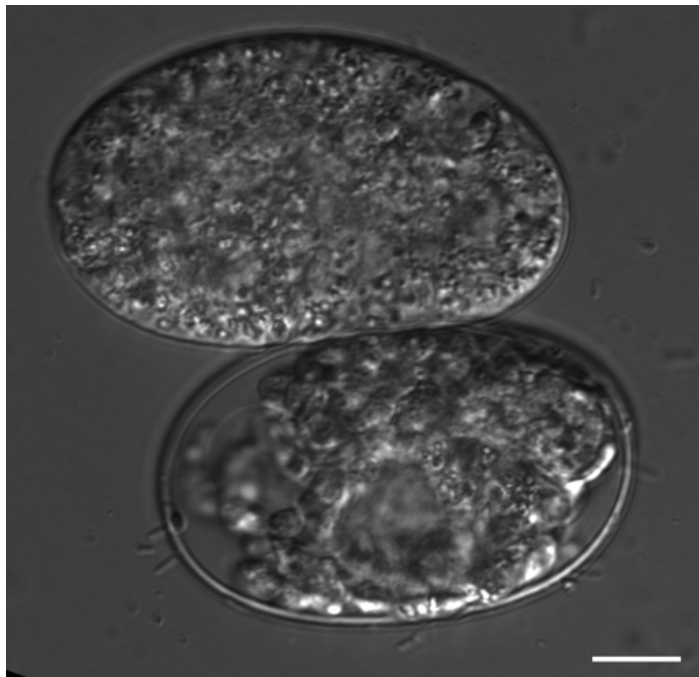



**Figure S5.16**

*D2096.12*

GE2499(*t1877*)

Embryos appear disorganized and some exhibit a contraction movement. Most have large vacuoles exhibiting Brownian motion and some eggs burst after incubation in water.

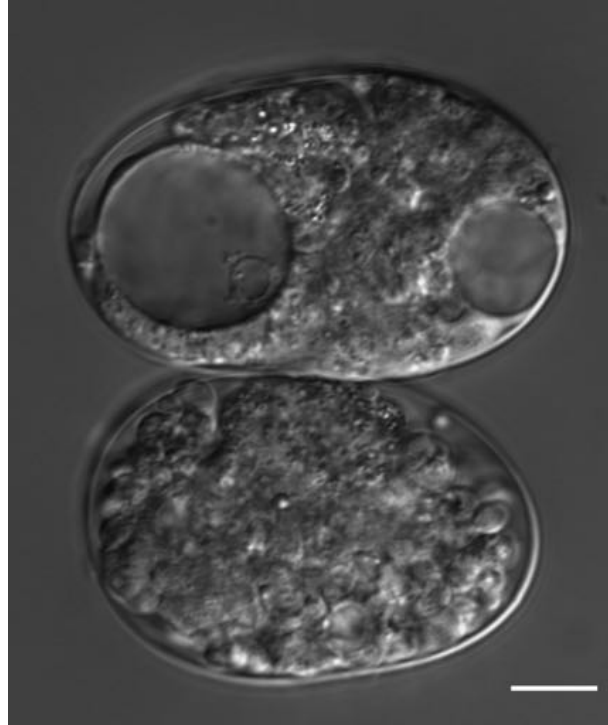

**Figure S5.17**

*D2096.12*

GE2407(*t1906*)

Embryos arrest with approximately 100 cells. Most exhibit a contraction movement. Some show signs of osmotic integrity defect.

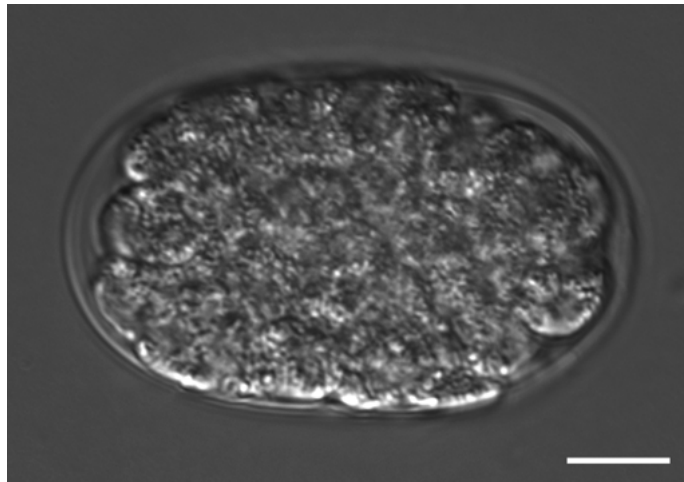



**Figure S5.18**

*ZK688.9*

*GE1713(t1433)*

Embryos arrest with  
approximately 100 cells.

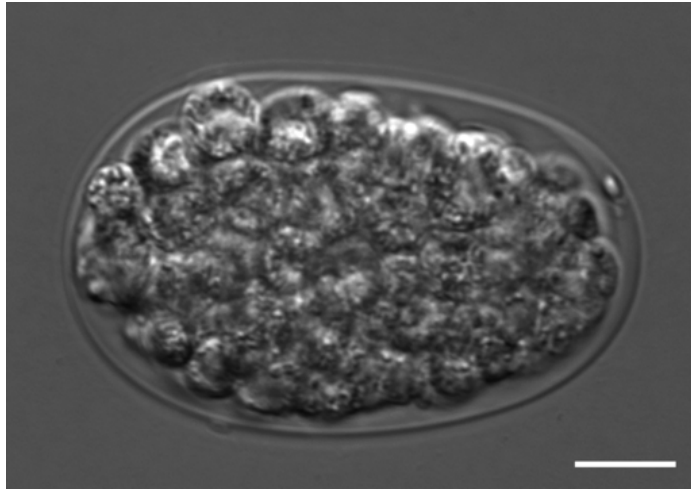

**Figure S5.19**

*ZK688.9*

*GE2621(t1587)*

Embryos arrest with  
approximately 100 cells.

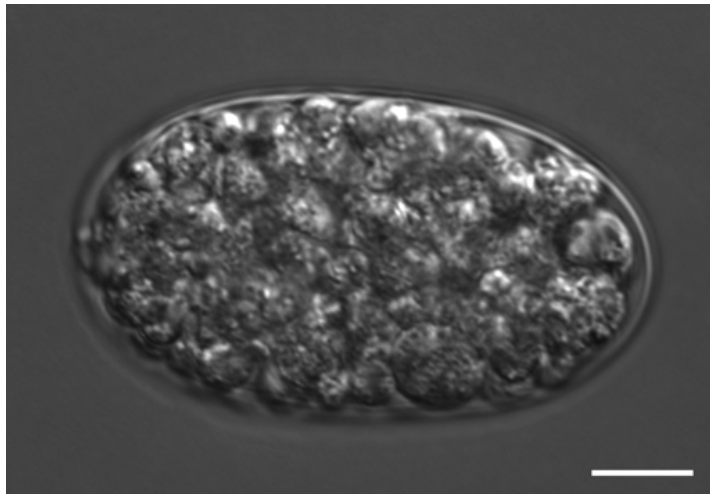



**Figure S5.20**

*top-3*

GE2399(*t1559*)

(Embryo incubated in M9  
buffer.)

Embryos arrest with  
approximately 100 cells.

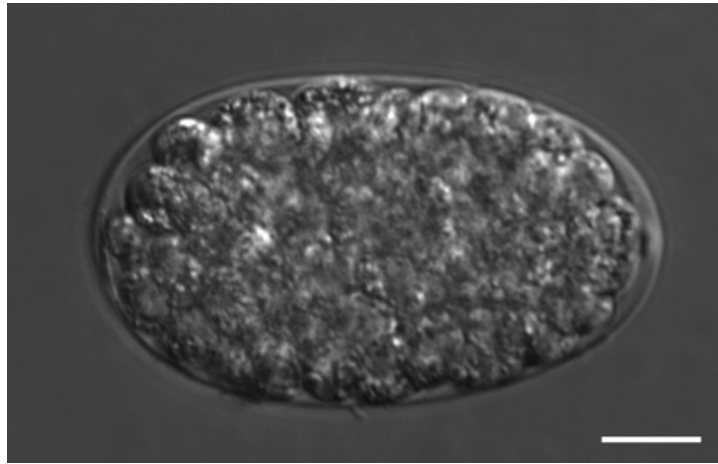

**Figure S5.21**

*top-3*

GE2220(*t1516*)

(Embryo incubated in M9  
buffer.)

Embryos arrest with  
approximately 100 cells.

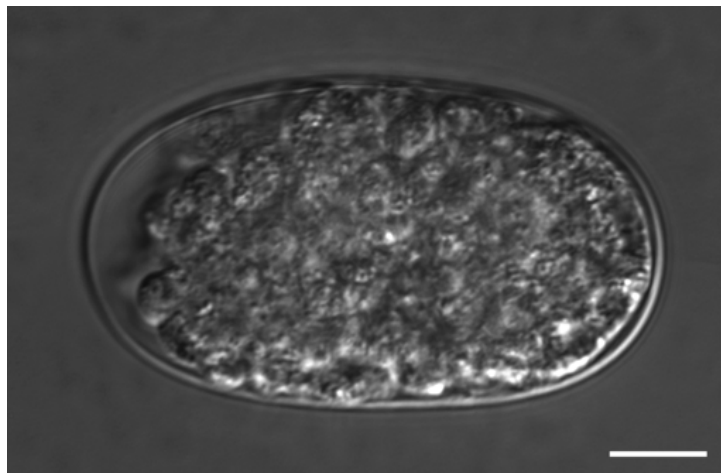



**Figure S5.22**

*cpt-2*

GE1938(*t1742*)

(Embryo incubated in M9  
buffer.)

Embryos arrest with  
approximately 100 cells.

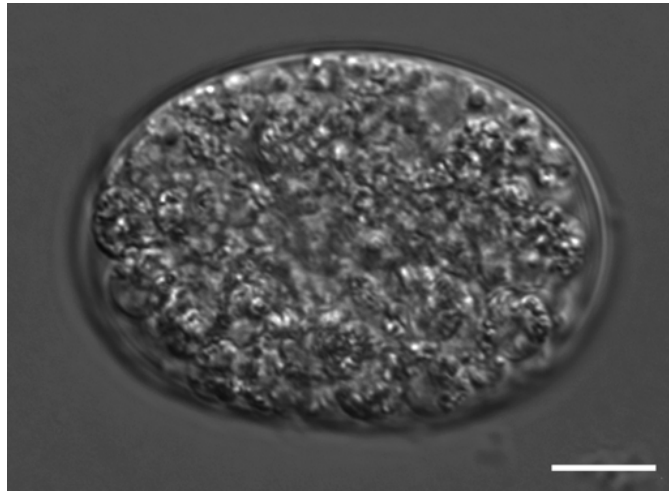

**Figure S5.23**

*cpt-2*

GE2447(*t1879*)

(Embryo incubated in M9  
buffer.)

Embryos arrest at the  
bean stage.

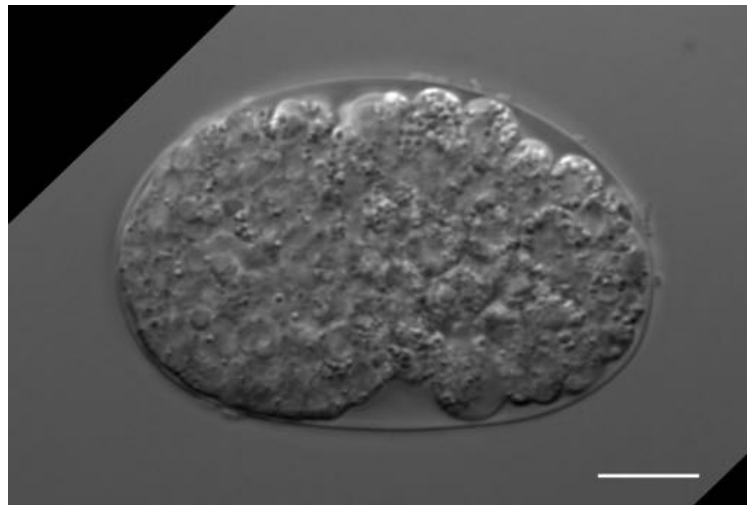



**Figure S5.24**

*atg-7*

GE1958(*t1726*)

Most embryos arrest around the 2-fold stage, moving, with a lumpy body wall.

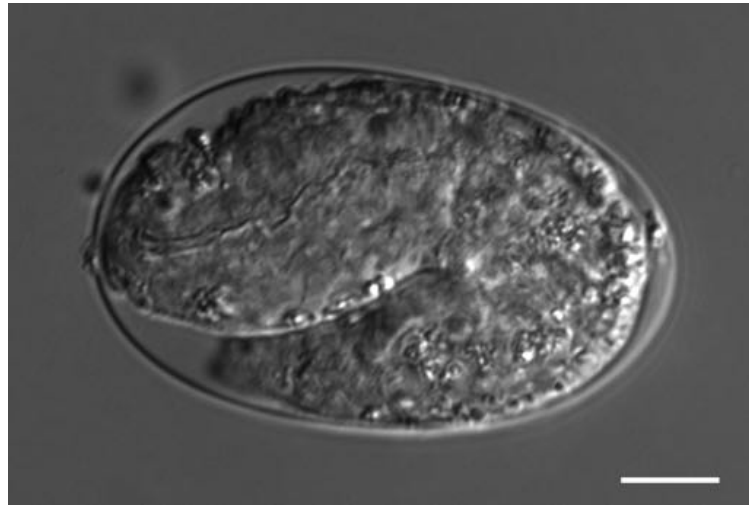

**Figure S5.25 A**

*atg-7*

GE1936(*t1738*)

Embryos arrest at the 2-fold stage.

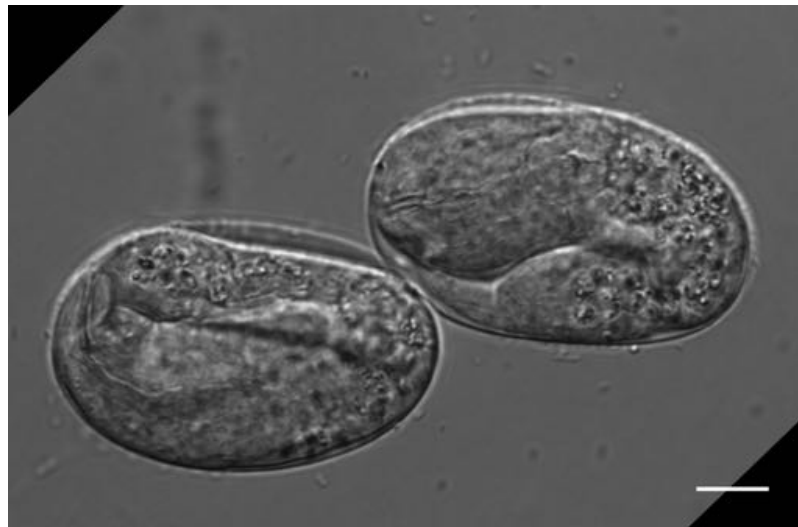



**Figure S5.25 B**

*atg-7*

GE1936(*t1738*)

Some embryos have invaginations along the body wall. Most embryos are moving inside the eggshell but do not hatch.

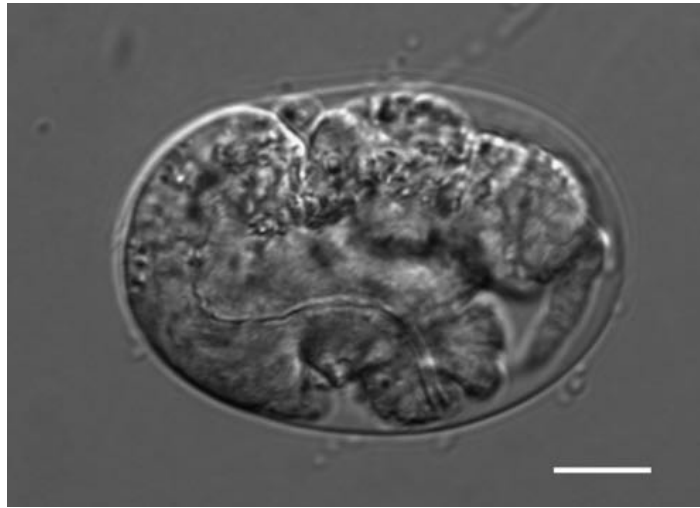

**Figure S5.26**

*nstp-2*

GE2091(*t1772*)

Embryos develop to approximately the 3-fold stage, with a lumpy body morphology and constricted nose tip.

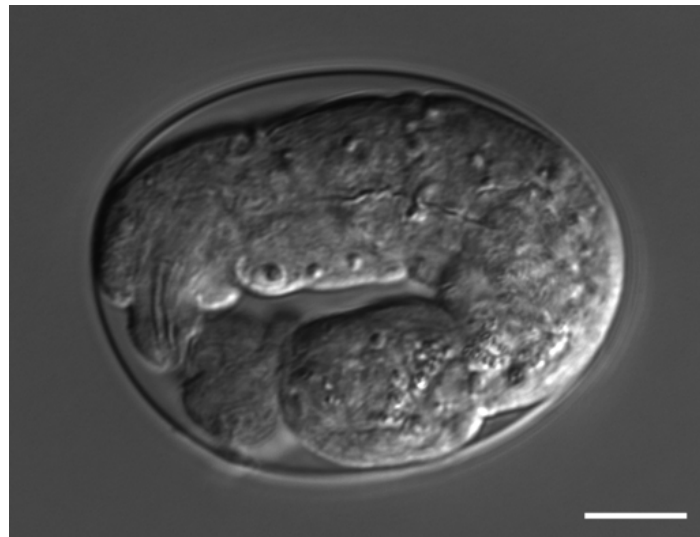



**Figure S5.27**

*nstp-2*

GE2288(*t1835*)

Embryos develop to the  
2-fold or 3-fold stage,  
with a lumpy body  
morphology and  
constricted nose tip.

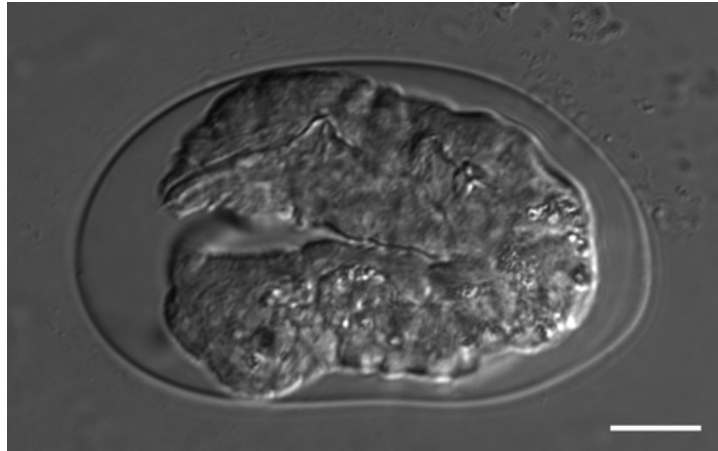

Supplement: Supplementary file 1 [file 2]
